# Supplementary material
Source: ML conference proceedings conference paper supplement (https://proceedings.neurips.cc/paper_files/paper/2018/hash/1dba3025b159cd9354da65e2d0436a31-Abstract.html)
Supplement: Supplementary file [file 1dba3025b159cd9354da65e2d0436a31-Supplemental.zip]

## A Static Network Models

### A.1 Proof of Theorem 1

*Proof.* We use  $\mathcal{Y}$  to denote the hypothesis class, which has the size of  $|\mathcal{Y}| = 2^n$ . By Fano's inequality [12], we have for any  $\hat{Y}$ ,

$$\begin{aligned}\mathbb{P}(\hat{Y} \neq Y^*) &\geq 1 - \frac{I(Y^*, A) + \log 2}{\log |\mathcal{Y}|} \\ &= 1 - \frac{I(Y^*, A) + \log 2}{n \log 2}.\end{aligned}\tag{1}$$

Our main step is to give an upper bound for the mutual information  $I(Y^*, A)$  in order to apply Fano's inequality. By using the pairwise KL-based bound from [35, p. 428] we have

$$\begin{aligned}I(Y^*, A) &\leq \frac{1}{|\mathcal{Y}|^2} \sum_{Y \in \mathcal{Y}} \sum_{Y' \in \mathcal{Y}} \mathbb{KL}(P_{A|Y} \| P_{A|Y'}) \\ &\leq \max_{Y, Y' \in \mathcal{Y}} \mathbb{KL}(P_{A|Y} \| P_{A|Y'}) \\ &= \max_{Y, Y' \in \mathcal{Y}} \sum_A \mathbb{P}(A|Y) \log \frac{\mathbb{P}(A|Y)}{\mathbb{P}(A|Y')} \\ &\stackrel{(a)}{\leq} \frac{n^2}{4} \max_{y_i, y_j, y'_i, y'_j} \sum_{A_{ij}} \mathbb{P}(A_{ij}|y_i, y_j) \log \frac{\mathbb{P}(A_{ij}|y_i, y_j)}{\mathbb{P}(A_{ij}|y'_i, y'_j)} \\ &\stackrel{(b)}{=} \frac{n^2}{4} \cdot \sum_{A_{ij}} \mathbb{P}(A_{ij}|y_i = y_j) \log \frac{\mathbb{P}(A_{ij}|y_i = y_j)}{\mathbb{P}(A_{ij}|y_i \neq y_j)} \\ &= \frac{n^2}{4} \cdot \left( p \log \frac{p}{q} + (1-p) \log \frac{1-p}{1-q} \right) \\ &= \frac{n^2}{4} \cdot \mathbb{KL}(p \| q).\end{aligned}\tag{2}$$

Among the equations above, (a) holds because  $A$  is symmetric, and  $A_{ij}$ 's are independent and identically distributed given  $Y$ , while (b) holds because for every  $i$  and  $j$ , we have

$$\sum_{A_{ij}} \mathbb{P}(A_{ij}|y_i = y_j) \log \frac{\mathbb{P}(A_{ij}|y_i = y_j)}{\mathbb{P}(A_{ij}|y_i \neq y_j)} > \sum_{A_{ij}} \mathbb{P}(A_{ij}|y_i \neq y_j) \log \frac{\mathbb{P}(A_{ij}|y_i \neq y_j)}{\mathbb{P}(A_{ij}|y_i = y_j)},$$

given that  $p > q$ . Next we use formula (16) from [10]:

$$\begin{aligned}\mathbb{KL}(p \| q) &= \left( p \log \frac{p}{q} + (1-p) \log \frac{1-p}{1-q} \right) \\ &\leq p \frac{p-q}{q} + (1-p) \frac{q-p}{1-q} \\ &= \frac{(p-q)^2}{q(1-q)}.\end{aligned}\tag{3}$$

By Fano's inequality [12] and by plugging (3) and (2) into (1), for the probability error to be at least  $1/2$ , it is sufficient for the lower bound to be greater than  $1/2$ . Therefore

$$\mathbb{P}(\hat{Y} \neq Y^*) \geq 1 - \frac{I(Y^*, A) + \log 2}{n \log 2} \geq 1 - \frac{\frac{n^2}{4} \cdot \frac{(p-q)^2}{q(1-q)} + \log 2}{n \log 2} \geq \frac{1}{2}.$$

By solving for  $n$  in the inequality above, we obtain that if

$$\frac{(p-q)^2}{q(1-q)} \leq \frac{2 \log 2}{n} - \frac{4 \log 2}{n^2},\tag{4}$$

then we have that  $\mathbb{P}(\hat{Y} \neq Y^*) \geq \frac{1}{2}$ .  $\square$

## A.2 Proof of Corollary 1

*Proof.* Starting from the probability distribution of the adjacency matrix  $A$ , we have

$$\begin{aligned}\mathbb{P}(A|Y) &= \frac{\exp(\beta \sum_{i < j} A_{ij} y_i y_j)}{\sum_{A' \in \{0,1\}^{n \times n}} \exp(\beta \sum_{i < j} A'_{ij} y_i y_j)} \\ &= \frac{\prod_{i < j} \exp(\beta A_{ij} y_i y_j)}{\prod_{i < j} (1 + \exp(\beta y_i y_j))} \\ &= \prod_{i < j} \frac{\exp(\beta A_{ij} y_i y_j)}{1 + \exp(\beta y_i y_j)} \\ &= \prod_{i < j} \mathbb{P}(A_{ij} | y_i, y_j).\end{aligned}$$

Thus,  $A_{ij}$  is Bernoulli with parameter  $\frac{\exp(\beta A_{ij} y_i y_j)}{1 + \exp(\beta y_i y_j)}$ . We denote  $p = \mathbb{P}(A_{ij} | y_i = y_j) = \frac{\exp(\beta)}{1 + \exp(\beta)}$ , and  $q = \mathbb{P}(A_{ij} | y_i \neq y_j) = \frac{\exp(-\beta)}{1 + \exp(-\beta)}$ . Plugging  $p$  and  $q$  into (4) and requiring the probability error to be at least  $1/2$ , we obtain that if

$$2(\cosh \beta - 1) \leq \frac{2 \log 2}{n} - \frac{4 \log 2}{n^2}, \quad (5)$$

then we have that  $\mathbb{P}(\hat{Y} \neq \bar{Y}) \geq \frac{1}{2}$ .  $\square$

## A.3 Moment Generating Function of Multivariate Gaussian Distribution

We introduce the following result from [24, p. 40], which will later be used in the proof of Theorem 2 and 4.

**Lemma 2.** *Let  $x \sim N_p(\mu, \Sigma)$ ,  $Q = x^\top A x$ ,  $A = A^\top$ . Then the moment generating function of  $Q$  is given by*

$$\begin{aligned}M_Q(t) &= \mathbb{E}_{x \sim N_p(\mu, \Sigma)}[\exp(tx^\top A x)] \\ &= \int_x \frac{\exp(tx^\top A x - \frac{1}{2}(x - \mu)^\top \Sigma^{-1}(x - \mu))}{(2\pi)^{p/2} |\Sigma|^{1/2}} dx.\end{aligned}$$

Furthermore, if  $(\Sigma^{-1} - 2tA)$  is symmetric positive definite, we have

$$\begin{aligned}M_Q(t) &= |I - 2t\Sigma^{1/2} A \Sigma^{1/2}|^{-1/2} \\ &\quad \cdot \exp\left(t\mu^\top \Sigma^{-1/2}(\Sigma^{1/2} A \Sigma^{1/2}) \cdot (I - 2t\Sigma^{1/2} A \Sigma^{1/2})^{-1} \Sigma^{-1/2} \mu\right).\end{aligned}$$

## A.4 Proof of Theorem 2

First, we start with a required technical lemma:

**Lemma 3.** *The model considered in Definition 3 is equivalent to the following Modified Latent Space Model:*

*Let  $d \in \mathbb{Z}^+$ ,  $\mu \in \mathbb{R}^d$  and  $\mu \neq 0, \sigma > 0$ . A modified Latent Space Model with parameters  $(d, \mu, \sigma)$  is an undirected graph of  $n$  nodes with the adjacency matrix  $A$ , where each  $A_{ij} \in \{0, 1\}$ . Each node is in one of the two classes  $\{+1, -1\}$ . The distribution of true labels  $Y^* = (y_1^*, \dots, y_n^*)$  is uniform, i.e., each label  $y_i^*$  is assigned to  $+1$  with probability 0.5, and  $-1$  with probability 0.5.*

*For every node  $i$ , the nature generates a latent  $d$ -dimensional vector  $x_i \in \mathbb{R}^d$  according to the Gaussian distribution  $N_d(\mathbf{0}, \sigma^2 \mathbf{I})$ .*

*The adjacency matrix  $A$  is distributed as follows: if  $y_i^* = y_j^*$  then  $A_{ij}$  is Bernoulli with parameter  $\exp(-\|x_i - x_j\|_2^2)$ ; otherwise  $A_{ij}$  is Bernoulli with parameter  $\exp(-\|x_i - x_j + 2y_i^* \mu\|_2^2)$ .*

*Proof.* We claim that the Modified Latent Space Model is equivalent to the classic Latent Space Model considered in Definition 3, by defining  $x_i = z_i - y_i\mu$  for every node  $i$ . Since  $z_i \sim N_d(y_i\mu, \sigma^2\mathbf{I})$ , we have  $x_i \sim N_d(\mathbf{0}, \sigma^2\mathbf{I})$ . As a result,

- if  $y_i^* = y_j^*$ ,  $A_{ij}$  is Bernoulli with parameter  $\exp(-\|z_i - z_j\|_2^2) = \exp(-\|x_i + y_i^*\mu - x_j - y_j^*\mu\|_2^2) = \exp(-\|x_i - x_j\|_2^2)$ ,
- if  $y_i^* = 1, y_j^* = -1$ ,  $A_{ij}$  is Bernoulli with parameter  $\exp(-\|z_i - z_j\|_2^2) = \exp(-\|x_i + \mu - x_j + \mu\|_2^2) = \exp(-\|x_i - x_j + 2\mu\|_2^2)$ ,
- if  $y_i^* = -1, y_j^* = 1$ ,  $A_{ij}$  is Bernoulli with parameter  $\exp(-\|z_i - z_j\|_2^2) = \exp(-\|x_i - \mu - x_j - \mu\|_2^2) = \exp(-\|x_i - x_j - 2\mu\|_2^2)$ .

This completes the proof of the lemma.  $\square$

Now, we provide the proof of the main theorem.

*Proof.* Since  $X$  and  $Y$  are independent, we have the following equalities

$$\begin{aligned}
\mathbb{P}(A_{ij}|y_i, y_j) &= \int_{x_i, x_j} \mathbb{P}(A_{ij}, x_i, x_j|y_i, y_j) dx_i dx_j \\
&= \int_{x_i, x_j} \mathbb{P}(x_i, x_j|y_i, y_j) \mathbb{P}(A_{ij}|y_i, y_j, x_i, x_j) dx_i dx_j \\
&= \int_{x_i, x_j} \mathbb{P}(x_i, x_j) \mathbb{P}(A_{ij}|y_i, y_j, x_i, x_j) dx_i dx_j \\
&= \mathbb{E}_{x_i, x_j} [\mathbb{P}(A_{ij}|y_i, y_j, x_i, x_j)].
\end{aligned} \tag{6}$$

The second last equality holds because in the modified model, latent vectors are independent of their labels. Now we are interested in the expectations  $\mathbb{E}_{x_i, x_j} [\mathbb{P}(A_{ij} = 1|y_i = y_j, x_i, x_j)]$  and  $\mathbb{E}_{x_i, x_j} [\mathbb{P}(A_{ij} = 1|y_i \neq y_j, x_i, x_j)]$ . By definition we know

$$\mathbb{E}_{x_i, x_j} [\mathbb{P}(A_{ij} = 1|y_i = y_j, x_i, x_j)] = \mathbb{E}_{x_i, x_j} [\exp(-\|x_i - x_j\|_2^2)],$$

and

$$\begin{aligned}
&\mathbb{E}_{x_i, x_j} [\mathbb{P}(A_{ij} = 1|y_i \neq y_j, x_i, x_j)] \\
&= \mathbb{P}(y_i = 1, y_j = -1|y_i \neq y_j) \cdot \mathbb{E}_{x_i, x_j} [\mathbb{P}(A_{ij} = 1|y_i = 1, y_j = -1, x_i, x_j)] \\
&\quad + \mathbb{P}(y_i = -1, y_j = 1|y_i \neq y_j) \cdot \mathbb{E}_{x_i, x_j} [\mathbb{P}(A_{ij} = 1|y_i = -1, y_j = 1, x_i, x_j)] \\
&= \frac{1}{2} \left( \mathbb{E}_{x_i, x_j} [\mathbb{P}(A_{ij} = 1|y_i = 1, y_j = -1, x_i, x_j)] + \mathbb{E}_{x_i, x_j} [\mathbb{P}(A_{ij} = 1|y_i = -1, y_j = 1, x_i, x_j)] \right).
\end{aligned}$$

Since  $x_i, x_j$  follow the distribution  $N_d(\mathbf{0}, \sigma^2\mathbf{I})$ , we have  $x_i - x_j \sim N_d(\mathbf{0}, 2\sigma^2\mathbf{I})$ ,  $x_i - x_j + 2y_i\mu \sim N_d(2y_i\mu, 2\sigma^2\mathbf{I})$ . Thus we can use Lemma 2 in Appendix A.3 with  $t = -1$  and obtain the following results:

$$\begin{aligned}
\mathbb{E}_{x_i, x_j} [\mathbb{P}(A_{ij} = 1|y_i = y_j, x_i, x_j)] &= (4\sigma^2 + 1)^{-d/2} \\
\mathbb{E}_{x_i, x_j} [\mathbb{P}(A_{ij} = 1|y_i = 1, y_j = -1, x_i, x_j)] &= (4\sigma^2 + 1)^{-d/2} \cdot \exp\left(-\frac{4\|\mu\|_2^2}{4\sigma^2 + 1}\right) \\
\mathbb{E}_{x_i, x_j} [\mathbb{P}(A_{ij} = 1|y_i = -1, y_j = 1, x_i, x_j)] &= (4\sigma^2 + 1)^{-d/2} \cdot \exp\left(-\frac{4\|\mu\|_2^2}{4\sigma^2 + 1}\right).
\end{aligned} \tag{7}$$

Notice that  $0 < \mathbb{E}_{x_i, x_j} [\mathbb{P}(A_{ij} = 1 | y_i \neq y_j, x_i, x_j)] < \mathbb{E}_{x_i, x_j} [\mathbb{P}(A_{ij} = 1 | y_i = y_j, x_i, x_j)] < 1$ . By using the pairwise KL-based bound from [35, p. 428] we have

$$\begin{aligned}
I(Y^*, A) &\leq \frac{1}{|\mathcal{Y}|^2} \sum_{Y \in \mathcal{Y}} \sum_{Y' \in \mathcal{Y}} \mathbb{KL}(P_{A|Y} \| P_{A|Y'}) \\
&\leq \max_{Y, Y' \in \mathcal{Y}} \mathbb{KL}(P_{A|Y} \| P_{A|Y'}) \\
&= \max_{Y, Y' \in \mathcal{Y}} \sum_A \mathbb{P}(A|Y) \log \frac{\mathbb{P}(A|Y)}{\mathbb{P}(A|Y')} \\
&\leq \frac{n^2}{4} \max_{y_i, y_j, y'_i, y'_j} \sum_{A_{ij}} \mathbb{P}(A_{ij} | y_i, y_j) \log \frac{\mathbb{P}(A_{ij} | y_i, y_j)}{\mathbb{P}(A_{ij} | y'_i, y'_j)} \\
&= \frac{n^2}{4} \max_{y_i, y_j, y'_i, y'_j} \sum_{A_{ij}} \mathbb{E}_{x_i, x_j} [\mathbb{P}(A_{ij} | y_i, y_j, x_i, x_j)] \cdot \log \frac{\mathbb{E}_{x_i, x_j} [\mathbb{P}(A_{ij} | y_i, y_j, x_i, x_j)]}{\mathbb{E}_{x_i, x_j} [\mathbb{P}(A_{ij} | y'_i, y'_j, x_i, x_j)]} \\
&= \sum_{A_{ij}} \mathbb{E}_{x_i, x_j} [\mathbb{P}(A_{ij} | y_i = y_j, x_i, x_j)] \cdot \log \frac{\mathbb{E}_{x_i, x_j} [\mathbb{P}(A_{ij} | y_i = y_j, x_i, x_j)]}{\mathbb{E}_{x_i, x_j} [\mathbb{P}(A_{ij} | y_i \neq y_j, x_i, x_j)]} \\
&\stackrel{(c)}{<} \mathbb{E}_{x_i, x_j} [\mathbb{P}(A_{ij} = 1 | y_i = y_j, x_i, x_j)] \cdot \log \frac{\mathbb{E}_{x_i, x_j} [\mathbb{P}(A_{ij} = 1 | y_i = y_j, x_i, x_j)]}{\mathbb{E}_{x_i, x_j} [\mathbb{P}(A_{ij} = 1 | y_i \neq y_j, x_i, x_j)]} \\
&= n^2 (4\sigma^2 + 1)^{-1-d/2} \|\mu\|_2^2, \tag{8}
\end{aligned}$$

where (c) holds because for every  $i$  and  $j$ , we have

$$\begin{aligned}
&\mathbb{E}_{x_i, x_j} [\mathbb{P}(A_{ij} = 0 | y_i = y_j, x_i, x_j)] \cdot \log \frac{\mathbb{E}_{x_i, x_j} [\mathbb{P}(A_{ij} = 0 | y_i = y_j, x_i, x_j)]}{\mathbb{E}_{x_i, x_j} [\mathbb{P}(A_{ij} = 0 | y_i \neq y_j, x_i, x_j)]} \\
&= (1 - \mathbb{E}_{x_i, x_j} [\mathbb{P}(A_{ij} = 1 | y_i = y_j, x_i, x_j)]) \cdot \log \frac{1 - \mathbb{E}_{x_i, x_j} [\mathbb{P}(A_{ij} = 1 | y_i = y_j, x_i, x_j)]}{1 - \mathbb{E}_{x_i, x_j} [\mathbb{P}(A_{ij} = 1 | y_i \neq y_j, x_i, x_j)]} \\
&= (1 - (4\sigma^2 + 1)^{-d/2}) \cdot \log \frac{1 - (4\sigma^2 + 1)^{-p/2}}{1 - (4\sigma^2 + 1)^{-d/2} \cdot \exp(-\frac{4\|\mu\|_2^2}{4\sigma^2 + 1})} \\
&< 0.
\end{aligned}$$

Thus, we only need to consider the case for  $A_{ij} = 1$ .

By Fano's inequality [12] and by plugging the result (8) into (1), for the probability error to be at least  $1/2$ , it is sufficient for the lower bound to be greater than  $1/2$ . Therefore we obtain that if

$$(4\sigma^2 + 1)^{-1-d/2} \|\mu\|_2^2 \leq \frac{\log 2}{2n} - \frac{\log 2}{n^2}, \tag{9}$$

then for any estimator  $\hat{Y}$ ,  $\mathbb{P}(\hat{Y} \neq Y^*) \geq \frac{1}{2}$ . □

## B Dynamic Network Models

### B.1 Proof of Lemma 1

*Proof.* For the first part, starting from the left-hand side, we have

$$\begin{aligned}
\mathbb{KL}(P_{A|Y} \| P_{A|Y'}) &= \sum_A \mathbb{P}(A|Y) \log \frac{\mathbb{P}(A|Y)}{\mathbb{P}(A|Y')} \\
&= \sum_A \left( \prod_{i < j} \mathbb{P}(A_{ij} | A_{\tau_{ij}}, y_i, y_j) \cdot \log \frac{\prod_{k < l} \mathbb{P}(A_{kl} | A_{\tau_{kl}}, y_k, y_l)}{\prod_{k < l} \mathbb{P}(A_{kl} | A_{\tau_{kl}}, y'_k, y'_l)} \right) \\
&= \sum_A \left( \prod_{i < j} \mathbb{P}(A_{ij} | A_{\tau_{ij}}, y_i, y_j) \cdot \sum_{k < l} \log \frac{\mathbb{P}(A_{kl} | A_{\tau_{kl}}, y_k, y_l)}{\mathbb{P}(A_{kl} | A_{\tau_{kl}}, y'_k, y'_l)} \right) \\
&= \sum_{k < l} \sum_A \left( \prod_{i < j} \mathbb{P}(A_{ij} | A_{\tau_{ij}}, y_i, y_j) \cdot \log \frac{\mathbb{P}(A_{kl} | A_{\tau_{kl}}, y_k, y_l)}{\mathbb{P}(A_{kl} | A_{\tau_{kl}}, y'_k, y'_l)} \right) \\
&= \sum_{k < l} \sum_A \left( P(A_{kl} | A_{\tau_{kl}}, y_k, y_l) \cdot \log \frac{\mathbb{P}(A_{kl} | A_{\tau_{kl}}, y_k, y_l)}{\mathbb{P}(A_{kl} | A_{\tau_{kl}}, y'_k, y'_l)} \right) \\
&= \sum_{i < j} \mathbb{KL}(P_{A_{ij} | A_{\tau_{ij}}, y_i, y_j} \| P_{A_{ij} | A_{\tau_{ij}}, y'_i, y'_j}) \\
&\leq \binom{n}{2} \max_{i,j} \mathbb{KL}(P_{A_{ij} | A_{\tau_{ij}}, y_i, y_j} \| P_{A_{ij} | A_{\tau_{ij}}, y'_i, y'_j}). \tag{10}
\end{aligned}$$

The proof for the second part follows the same approach.  $\square$

### B.2 Proof of Theorem 3

*Proof.* For simplicity we use the shorthand notation  $f_{ij} = f_{|\tau_{ij}|}(A_{\tau_{ij}})$ . By using the pairwise KL-based bound from [35, p. 428] and Lemma 1, we have

$$\begin{aligned}
I(Y^*, A) &\leq \frac{1}{|\mathcal{Y}|^2} \sum_{Y \in \mathcal{Y}} \sum_{Y' \in \mathcal{Y}} \mathbb{KL}(P_{A|Y} \| P_{A|Y'}) \\
&\leq \max_{Y, Y' \in \mathcal{Y}} \mathbb{KL}(P_{A|Y} \| P_{A|Y'}) \\
&\leq \max_{y_i, y_j, y'_i, y'_j} \binom{n}{2} \max_{i,j} \mathbb{KL}(P_{A_{ij} | A_{\tau_{ij}}, y_i, y_j} \| P_{A_{ij} | A_{\tau_{ij}}, y'_i, y'_j}) \\
&= \binom{n}{2} \max_{i,j} \sum_{A_{ij}} \mathbb{P}(A_{ij} | A_{\tau_{ij}}, y_i = y_j) \cdot \log \frac{\mathbb{P}(A_{ij} | A_{\tau_{ij}}, y_i = y_j)}{\mathbb{P}(A_{ij} | A_{\tau_{ij}}, y'_i \neq y'_j)} \\
&= \binom{n}{2} \max_{i,j} \left( pf_{ij} \log \frac{pf_{ij}}{qf_{ij}} + (1 - pf_{ij}) \log \frac{1 - pf_{ij}}{1 - qf_{ij}} \right) \\
&= \binom{n}{2} \max_{i,j} \mathbb{KL}(pf_{ij} \| qf_{ij}) \\
&\leq \binom{n}{2} \max_{i,j} pf_{ij} \frac{pf_{ij} - qf_{ij}}{qf_{ij}} + (1 - pf_{ij}) \frac{qf_{ij} - pf_{ij}}{1 - qf_{ij}} \\
&= \binom{n}{2} \max_{i,j} \frac{f_{ij}(p - q)^2}{q(1 - qf_{ij})} \\
&\leq \binom{n}{2} \frac{(p - q)^2}{q(1 - q)}. \tag{11}
\end{aligned}$$

By Fano's inequality [12] and by plugging (11) into (1), for the probability error to be at least  $1/2$ , it is sufficient for the lower bound to be greater than  $1/2$ . Therefore

$$\mathbb{P}(\hat{Y} \neq \bar{Y}) \geq 1 - \frac{I(Y^*, A) + \log 2}{n \log 2} \geq 1 - \frac{\frac{n^2-n}{2} \cdot \frac{(p-q)^2}{q(1-q)} + \log 2}{n \log 2} \geq \frac{1}{2}$$

By solving for  $n$  in the inequality above, we obtain that if

$$\frac{(p-q)^2}{q(1-q)} \leq \frac{n-2}{n^2-n} \log 2, \quad (12)$$

then we have that  $\mathbb{P}(\hat{Y} \neq \bar{Y}) \geq \frac{1}{2}$ .  $\square$

### B.3 Proof of Theorem 4

First, we start with a required technical lemma:

**Lemma 4.** *The model considered in Definition 6 is equivalent to the following Modified Dynamic Latent Space Model:*

Let  $d \in \mathbb{Z}^+$ ,  $\mu \in \mathbb{R}^d$  and  $\mu \neq 0, \sigma > 0$ . Let  $F = \{f_k\}_{k=0}^{\binom{n}{2}}$  be a set of functions, where  $f_k : \{0, 1\}^k \rightarrow (0, 1]$ . A modified Latent Space Model with parameters  $(d, \mu, \sigma, F)$  is an undirected graph of  $n$  nodes with the adjacency matrix  $A$ , where each  $A_{ij} \in \{0, 1\}$ . Each node is in one of the two classes  $\{+1, -1\}$ . The distribution of true labels  $Y^* = (y_1^*, \dots, y_n^*)$  is uniform, i.e., each label  $y_i^*$  is assigned to  $+1$  with probability 0.5, and  $-1$  with probability 0.5.

For every node  $i$ , the nature generates a latent  $d$ -dimensional vector  $x_i \in \mathbb{R}^d$  according to the Gaussian distribution  $N_d(\mathbf{0}, \sigma^2 \mathbf{I})$ .

The adjacency matrix  $A$  is distributed as follows: if  $y_i^* = y_j^*$  then  $A_{ij}$  is Bernoulli with parameter  $f_{|\tau_{ij}|}(A_{\tau_{ij}}) \cdot \exp(-\|x_i - x_j\|_2^2)$ ; otherwise  $A_{ij}$  is Bernoulli with parameter  $f_{|\tau_{ij}|}(A_{\tau_{ij}}) \cdot \exp(-\|x_i - x_j + 2y_i^* \mu\|_2^2)$ .

*Proof.* We claim that the Modified Dynamic Latent Space Model is equivalent to the model considered in Definition 6, by defining  $x_i = z_i - y_i \mu$  for every node  $i$ . Since  $z_i \sim N_d(y_i \mu, \sigma^2 \mathbf{I})$ , we have  $x_i \sim N_d(\mathbf{0}, \sigma^2 \mathbf{I})$ . As a result,

- if  $y_i^* = y_j^*$ ,  $A_{ij}$  is Bernoulli with parameter  $f_{|\tau_{ij}|}(A_{\tau_{ij}}) \cdot \exp(-\|z_i - z_j\|_2^2) = f_{|\tau_{ij}|}(A_{\tau_{ij}}) \cdot \exp(-\|x_i + y_i^* \mu - x_j - y_j^* \mu\|_2^2) = f_{|\tau_{ij}|}(A_{\tau_{ij}}) \cdot \exp(-\|x_i - x_j\|_2^2)$ ,
- if  $y_i^* = 1, y_j^* = -1$ ,  $A_{ij}$  is Bernoulli with parameter  $f_{|\tau_{ij}|}(A_{\tau_{ij}}) \cdot \exp(-\|z_i - z_j\|_2^2) = f_{|\tau_{ij}|}(A_{\tau_{ij}}) \cdot \exp(-\|x_i + \mu - x_j + \mu\|_2^2) = f_{|\tau_{ij}|}(A_{\tau_{ij}}) \cdot \exp(-\|x_i - x_j + 2\mu\|_2^2)$ ,
- if  $y_i^* = -1, y_j^* = 1$ ,  $A_{ij}$  is Bernoulli with parameter  $f_{|\tau_{ij}|}(A_{\tau_{ij}}) \cdot \exp(-\|z_i - z_j\|_2^2) = f_{|\tau_{ij}|}(A_{\tau_{ij}}) \cdot \exp(-\|x_i - \mu - x_j - \mu\|_2^2) = f_{|\tau_{ij}|}(A_{\tau_{ij}}) \cdot \exp(-\|x_i - x_j - 2\mu\|_2^2)$ .

This completes the proof of the lemma.  $\square$

Now, we provide the proof of the main theorem.

*Proof.* Since  $X$  and  $Y$  are independent, we have the following equalities

$$\begin{aligned} \mathbb{P}(A_{ij} | A_{\tau_{ij}}, y_i, y_j) &= \int_{x_i, x_j} \mathbb{P}(A_{ij}, x_i, x_j | A_{\tau_{ij}}, y_i, y_j) dx_i dx_j \\ &= \int_{x_i, x_j} \mathbb{P}(x_i, x_j | A_{\tau_{ij}}, y_i, y_j) \cdot \mathbb{P}(A_{ij} | A_{\tau_{ij}}, y_i, y_j, x_i, x_j) dx_i dx_j \\ &= \int_{x_i, x_j} \mathbb{P}(x_i, x_j) \mathbb{P}(A_{ij} | A_{\tau_{ij}}, y_i, y_j, x_i, x_j) dx_i dx_j \\ &= \mathbb{E}_{x_i, x_j} [\mathbb{P}(A_{ij} | A_{\tau_{ij}}, y_i, y_j, x_i, x_j)]. \end{aligned} \quad (13)$$

The second last equality holds because in the modified model, latent vectors are independent of their labels. Using Lemma 2 in Appendix A.3 and following the analysis in (7), we have

$$\begin{aligned}\mathbb{E}_{x_i, x_j}[\mathbb{P}(A_{ij} = 1 | y_i = y_j, x_i, x_j)] &= f_{|\tau_{ij}|} \cdot (4\sigma^2 + 1)^{-d/2} \\ \mathbb{E}_{x_i, x_j}[\mathbb{P}(A_{ij} = 1 | y_i \neq y_j, x_i, x_j)] &= f_{|\tau_{ij}|} \cdot (4\sigma^2 + 1)^{-d/2} \cdot \exp\left(-\frac{4\|\mu\|_2^2}{4\sigma^2 + 1}\right).\end{aligned}\tag{14}$$

Using the pairwise KL-based bound from [35, p. 428] and Lemma 1, we have

$$\begin{aligned}I(Y^*, A) &\leq \frac{1}{|\mathcal{Y}|^2} \sum_{Y \in \mathcal{Y}} \sum_{Y' \in \mathcal{Y}} \mathbb{KL}(P_{A|Y} \| P_{A|Y'}) \\ &\leq \max_{Y, Y' \in \mathcal{Y}} \mathbb{KL}(P_{A|Y} \| P_{A|Y'}) \\ &\leq \max_{y_i, y_j, y'_i, y'_j} \binom{n}{2} \max_{i, j} \mathbb{KL}(P_{A_{ij}|A_{\tau_{ij}}, y_i, y_j} \| P_{A_{ij}|A_{\tau_{ij}}, y'_i, y'_j}) \\ &= \max_{y_i, y_j, y'_i, y'_j} \binom{n}{2} \max_{i, j} \sum_{A_{ij}} \mathbb{P}(A_{ij} | A_{\tau_{ij}}, y_i = y_j) \cdot \log \frac{\mathbb{P}(A_{ij} | A_{\tau_{ij}}, y_i = y_j)}{\mathbb{P}(A_{ij} | A_{\tau_{ij}}, y'_i \neq y'_j)} \\ &= \max_{y_i, y_j, y'_i, y'_j} \binom{n}{2} \max_{i, j} \sum_{A_{ij}} \mathbb{E}_{x_i, x_j} [\mathbb{P}(A_{ij} | A_{\tau_{ij}}, y_i, y_j, x_i, x_j)] \\ &\quad \cdot \log \frac{\mathbb{E}_{x_i, x_j} [\mathbb{P}(A_{ij} | A_{\tau_{ij}}, y_i, y_j, x_i, x_j)]}{\mathbb{E}_{x_i, x_j} [\mathbb{P}(A_{ij} | A_{\tau_{ij}}, y'_i, y'_j, x_i, x_j)]} \\ &= \binom{n}{2} \max_{i, j} \sum_{A_{ij}} \mathbb{E}_{x_i, x_j} [\mathbb{P}(A_{ij} | y_i = y_j, A_{\tau_{ij}}, x_i, x_j)] \\ &\quad \cdot \log \frac{\mathbb{E}_{x_i, x_j} [\mathbb{P}(A_{ij} | y_i = y_j, A_{\tau_{ij}}, x_i, x_j)]}{\mathbb{E}_{x_i, x_j} [\mathbb{P}(A_{ij} | y_i \neq y_j, A_{\tau_{ij}}, x_i, x_j)]} \\ &< \binom{n}{2} \max_{i, j} \mathbb{E}_{x_i, x_j} [\mathbb{P}(A_{ij} = 1 | y_i = y_j, A_{\tau_{ij}}, x_i, x_j)] \\ &\quad \cdot \log \frac{\mathbb{E}_{x_i, x_j} [\mathbb{P}(A_{ij} = 1 | y_i = y_j, A_{\tau_{ij}}, x_i, x_j)]}{\mathbb{E}_{x_i, x_j} [\mathbb{P}(A_{ij} = 1 | y_i \neq y_j, A_{\tau_{ij}}, x_i, x_j)]} \\ &= \binom{n}{2} \max_{i, j} f_{|\tau_{ij}|}(A_{\tau_{ij}}) \cdot (4\sigma^2 + 1)^{-d/2} \cdot \log \left(1 / \exp\left(-\frac{4\|\mu\|_2^2}{4\sigma^2 + 1}\right)\right) \\ &= \binom{n}{2} \max_{i, j} f_{|\tau_{ij}|}(A_{\tau_{ij}}) \cdot 4(4\sigma^2 + 1)^{-1-d/2} \|\mu\|_2^2 \\ &\leq \binom{n}{2} 4(4\sigma^2 + 1)^{-1-d/2} \|\mu\|_2^2 \\ &= 2(n^2 - n)(4\sigma^2 + 1)^{-1-d/2} \|\mu\|_2^2.\end{aligned}\tag{15}$$

By Fano's inequality [12] and by plugging (15) into (1), for the probability error to be at least 1/2, it is sufficient for the lower bound to be greater than 1/2. Therefore

$$\mathbb{P}(\hat{Y} \neq \bar{Y}) \geq 1 - \frac{I(Y^*, A) + \log 2}{n \log 2} \geq 1 - \frac{2(n^2 - n)(4\sigma^2 + 1)^{-1-d/2} \|\mu\|_2^2 + \log 2}{n \log 2} \geq \frac{1}{2}.$$

By solving for  $n$  in the inequality above, we obtain that if

$$(4\sigma^2 + 1)^{-1-d/2} \|\mu\|_2^2 \leq \frac{n - 2}{4(n^2 - n)} \log 2,\tag{16}$$

then we have that  $\mathbb{P}(\hat{Y} \neq \bar{Y}) \geq \frac{1}{2}$ .  $\square$

## C Directed Network Models

### C.1 Proof of Theorem 5

*Proof.* For simplicity we use the shorthand notation  $o_{ji} = \sum_{k=1}^{i-1} A_{jk}$  to denote the number of directed edges from node  $j$  to the first  $i$  nodes. Thus we have  $w_{ji} = \frac{(o_{ji}+1)(\mathbf{1}[y_i=y_j]s+1)}{\sum_{k=1}^{i-1} (o_{ki}+1)(\mathbf{1}[y_i=y_k]s+1)}$  and  $0 \leq o_{ji} \leq i - j - 1$ . This is because a node can never connect to its previous nodes according to the definition. Additionally  $o_{ki} \leq i - m - 1$  for  $k \leq m$  since the first  $m$  nodes are not connected to each other.

From Algorithm 1 we can observe that  $\tilde{w}_{ji} \leq \frac{1}{m}$  and  $\tilde{w}_{ji} \geq \min w_{ji}$ . Thus we have  $\tilde{w}_{ji} \geq \min w_{ji} \geq \frac{2(\mathbf{1}[y_i=y_j]s+1)}{(i-m)(i+m-1)(s+1)}$  by assuming  $o_{ji} = 0$ ,  $o_{ki} = i - m - 1$  for every  $k \leq m$ , and  $o_{li} = i - l - 1$  for every  $l > m$ .

By using the pairwise KL-based bound from [35, p. 428] and Lemma 1, we have

$$\begin{aligned}
I(Y^*, A) &\leq \frac{1}{|\mathcal{Y}|^2} \sum_{Y \in \mathcal{Y}} \sum_{Y' \in \mathcal{Y}} \mathbb{KL}(P_{A|Y} \| P_{A|Y'}) \\
&\leq \max_{Y, Y' \in \mathcal{Y}} \mathbb{KL}(P_{A|Y} \| P_{A|Y'}) \\
&\leq \max_{Y, Y' \in \mathcal{Y}} \binom{n}{2} \max_{j,i} \mathbb{KL}(P_{A_{ji}|A_{\tau_{ji}, y_1, \dots, y_i}} \| P_{A_{ji}|A_{\tau_{ji}, y'_1, \dots, y'_i}}) \\
&\leq \max_{Y, Y' \in \mathcal{Y}} \binom{n}{2} \max_{j,i} m \tilde{w}_{ji} \cdot \log \frac{m \tilde{w}_{ji}}{m \tilde{w}'_{ji}} \\
&\leq \binom{n}{2} \log \frac{1}{\frac{2m}{(n-m)(n+m-1)(s+1)}} \\
&= (n^2 - n)/2 \cdot \log \frac{(n-m)(n+m-1)(s+1)}{2m} \\
&\leq (n^2 - n)/2 \cdot \log \frac{n^2(s+1)}{8m}.
\end{aligned} \tag{17}$$

By Fano's inequality [12] and by plugging (11) into (1), for the probability error to be at least  $1/2$ , it is sufficient for the lower bound to be greater than  $1/2$ . Therefore

$$\mathbb{P}(\hat{Y} \neq \bar{Y}) \geq 1 - \frac{I(Y^*, A) + \log 2}{n \log 2} \geq 1 - \frac{\frac{n^2-n}{2} \cdot \log \frac{n^2(s+1)}{8m} + \log 2}{n \log 2} \geq \frac{1}{2}.$$

By solving for  $n$  in the inequality above, we obtain that if

$$\log \frac{s+1}{8m} \leq \frac{n-2}{n^2-n} \log 2 - 2 \log n, \tag{18}$$

or equivalently,

$$\frac{s+1}{8m} \leq \frac{2^{(n-2)/(n^2-n)}}{n^2}, \tag{19}$$

then we have that  $\mathbb{P}(\hat{Y} \neq \bar{Y}) \geq \frac{1}{2}$ .  $\square$

### C.2 Proof of Theorem 6

*Proof.* From Algorithm 1 we can observe that  $\tilde{w}_{ji} \leq \frac{1}{m}$  and  $\tilde{w}_{ji} \geq \min w_{ji}$ . Thus we have for any node  $j \in \{i-m, \dots, i-1\}$ ,  $\tilde{w}_{ji} \geq \min_{j \in \{i-m, \dots, i-1\}} w_{ji} \geq \frac{p(\mathbf{1}[y_i=y_j]s+1)}{m(s+1)}$  by assuming  $y_i = y_k$  for every  $k \in \{i-m, \dots, i-1\}$ . Similarly, for any node  $j \in \{1, \dots, i-m-1\}$ , we have  $\tilde{w}_{ji} \geq \min_{j \in \{1, \dots, i-m-1\}} w_{ji} \geq \frac{(1-p)(\mathbf{1}[y_i=y_j]s+1)}{(i-m-1)(s+1)}$  by assuming  $y_i = y_k$  for every  $k \in \{1, \dots, i-m-1\}$ .

By using the pairwise KL-based bound from [35, p. 428] and Lemma 1, we have



$$\begin{aligned}
I(Y^*, A) &\leq \frac{1}{|\mathcal{Y}|^2} \sum_{Y \in \mathcal{Y}} \sum_{Y' \in \mathcal{Y}} \mathbb{KL}(P_{A|Y} \| P_{A|Y'}) \\
&\leq \max_{Y, Y' \in \mathcal{Y}} \mathbb{KL}(P_{A|Y} \| P_{A|Y'}) \\
&\leq \max_{Y, Y' \in \mathcal{Y}} m(n-m) \max_{j \in \{i-m, \dots, i-1\}} \mathbb{KL}(P_{A_{ji}|A_{\tau_{ji}}, y_1, \dots, y_i} \| P_{A_{ji}|A_{\tau_{ji}}, y'_1, \dots, y'_i}) \\
&\quad + \binom{n-m}{2} \max_{i', j' \in \{1, \dots, i'-m-1\}} \mathbb{KL}(P_{A_{ji}|A_{\tau_{ji'}}, y_1, \dots, y'_i} \| P_{A_{ji'}|A_{\tau_{ji'}}, y'_1, \dots, y'_{i'}}) \\
&\leq m(n-m) \log \frac{1}{\frac{p}{s+1}} + \binom{n-m}{2} \log \frac{1}{\frac{m(1-p)}{(n-m-1)(s+1)}} \\
&= m(n-m) \log \frac{s+1}{p} + \binom{n-m}{2} \log \frac{(n-m-1)(s+1)}{m(1-p)} \\
&\leq \frac{n^2}{4} \log \frac{s+1}{p} + \frac{n^2}{4} \log \frac{n(s+1)}{m(1-p)} \\
&= \frac{n^2}{4} \left( \log \frac{(s+1)^2}{mp(1-p)} + \log n \right). \tag{20}
\end{aligned}$$

By Fano's inequality [12] and by plugging (11) into (1), for the probability error to be at least  $1/2$ , it is sufficient for the lower bound to be greater than  $1/2$ . Therefore

$$\mathbb{P}(\hat{Y} \neq \bar{Y}) \geq 1 - \frac{I(Y^*, A) + \log 2}{n \log 2} \geq 1 - \frac{\frac{n^2}{4} \left( \log \frac{(s+1)^2}{mp(1-p)} + \log n \right) + \log 2}{n \log 2} \geq \frac{1}{2}.$$

By solving for  $n$  in the inequality above, we obtain that if

$$\log \frac{(s+1)^2}{mp(1-p)} \leq \frac{2 \log 2}{n} - \frac{4 \log 2}{n^2} - \log n, \tag{21}$$

or equivalently,

$$\frac{(s+1)^2}{mp(1-p)} \leq \frac{2^{2(n-2)/n^2}}{n}, \tag{22}$$

then we have that  $\mathbb{P}(\hat{Y} \neq \bar{Y}) \geq \frac{1}{2}$ .  $\square$
